# Supplementary material for: Topological Phase Transitions and Phase-Locking Dynamics in Proteomic Networks: A Deterministic Model of Structural Robustness
Source: Research Square preprint supplement (doi:10.21203/rs.3.rs-8595475/v1), 2026-01-21
Supplement: Supplementary file 1 [file 1547dca3953dbd741b97543a.docx]

 A novel deterministic model for **proteomic stability** based on fractal scaling is proposed.

 The Coherence Coefficient () identifies a **discontinuous phase transition** at .

 Pathological rigidity in prions and amyloid fibrils is modeled as "topological locking."

 Systemic stability is quantified via a **Kuramoto-based phase-coherence index** ().

 Validation on 1,150+ structures confirms **universal invariants** in biological control.
